# Supplementary material for: Deciphering Organization of GOES–16 Green Cumulus, through the EOF Lens
Source: Copernicus journal article supplement (doi:10.5194/acp-2020-1242), 2021-01-06
Supplement: Supplementary file [file acp-2020-1242-AC1-supplement.pdf]

# Reply to Reviewer #1

*Manuscript ID acp-2020-1242*

*“Deciphering Organization of GOES-16 Green Cumulus, through the EOF Lens”*

*Tom Dror, Mickaël D. Chekroun, Orit Altaratz and Ilan Koren*

*ACP*

---

We are grateful for the careful report and positive comments of the reviewer about our manuscript and the pattern analysis performed therein. In that respect, we enhance the visual rendering of the patterns shown in Fig. 2, 3 and 6. We hope that this paper will be helpful for the community, and will encourage the use of EOF and other decomposition methods in studying cloud field organization.

---
